# Supplementary material for: Phonon thermal conductivity reduction in silicene nanotubes with isotope substitution
Source: Royal Society of Chemistry journal article supplement (doi:10.1039/d0ra00834f), 2020-01-01
Supplement: d0ra00834f1.pdf [file d0ra00834f1.pdf]

## Supplementary Information

### Phonon thermal conductivity reduction in silicene nanotubes with isotope substitution

Xiaodong Yu, Haipeng Li,\* Jiasheng Zhou

School of Materials and Physics, China University of Mining and Technology, Xuzhou 221116, P. R. China.

\* Correspondence to:

[haipli@cumt.edu.cn](mailto:haipli@cumt.edu.cn) (Haipeng Li)

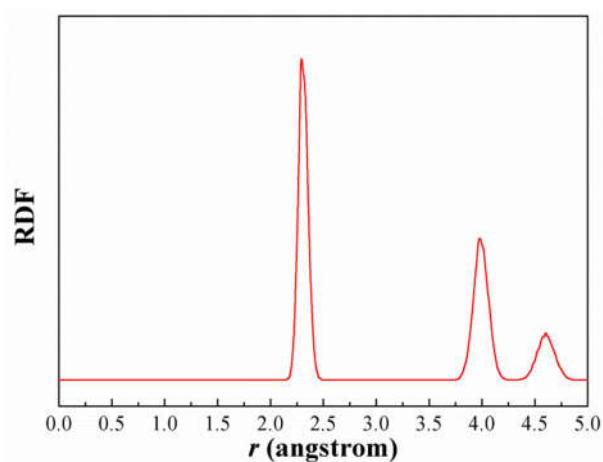

**Fig.S1** Selected radial distribution function (RDF) for the optimized SNT. The position of the first peak of RDF shows the nearest-neighbor distance of 0.229 nm.

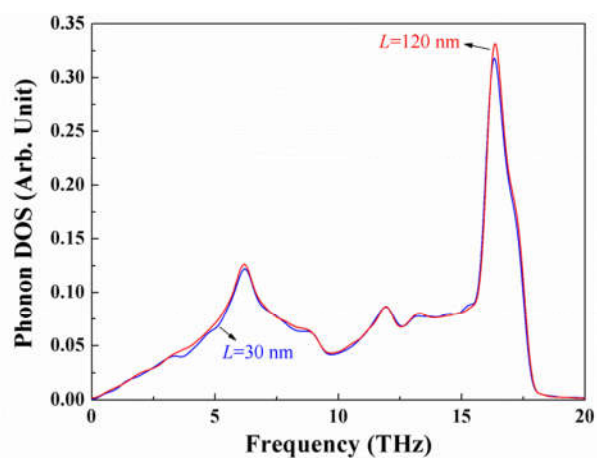

**Fig.S2** Phonon DOS of 8 nm-diameter armchair SNTs with 30 nm length and 120 nm length, respectively.
